# Supplementary material for: Targeting breast to brain metastatic tumours with death receptor ligand expressing therapeutic stem cells
Source: Oxford University Press journal article supplement (doi:10.1093/brain/awv094), 2015-04-23
Supplement: awv094_Supplementary_Data.zip [file awv094_Supplementary_Data.zip]

## Supplementary Figures

**Figure 1.** Engineering a metastatic breast cancer cell line and characteristics of breast-to-brain metastatic tumors. **(A)** Representative fluorescent image of MBr-FmC cells transduced with lentiviral vector encoding Fluc and mCherry. Plot showing the Fluc activity of tumor cells with different cell numbers. **(B)** Representative bioluminescent images of MBr-FmC tumors formed by intracranial injection and plot showing the tumor growth over time. **(C)** Representative composite fluorescent images of coronal brain sections of MBr-FmC tumors on d28 after intracranially injected. **(D)** Composite fluorescent images of a representative brain section after intracarotid injection of MBr-FmC tumor cells. Red: mCherry labeled tumor cells. **(E)** Arrow head points out the hemorrhage spots in the brain 35 days after intracarotid injection of MBr-FmC cells. **(F)** Representative fluorescent images of mCherry-labeled tumor cells (red) and GFAP-labeled reactive astrocytes (green), DAPI (blue) stained the nucleus (scale bar = 100  $\mu$ m).

**Figure 2.** Assessment of two NSC lines for their survival ability. **(A)** Top: Representative fluorescent image of 1<sup>o</sup>NSC transduced with LV-GFP-Fluc. Bottom: Plot showing the Fluc activity of 1<sup>o</sup>NSC with different cell numbers. **(B)** Top: Representative fluorescent image of NSC transduced with LV-GFP-Fluc. Bottom: Plot showing the Fluc activity of NSC with different cell numbers. **(C)** Survival of NSC *in vivo*. Top: Representative bioluminescent images of 1<sup>o</sup>NSC-GFI and NSC-GFI taken on day 0 and 7 after intracranial implantation. Bottom: Plot showing the Fluc activity of 1<sup>o</sup>NSC-GFI or NSC-GFI *in vivo*.

Figure 3. Interaction of NSC, metastatic tumor cells and brain endothelial cells after intraparenchymal injection of NSC. Representative fluorescent images of NSC-GFP (green) and mCherry-labeled tumor cells (red), and brain endothelium labeled with CD31 (blue) (scale bar = 100  $\mu$ m). Figure 4. Generation and functional characterization of NSC expressing S-TRAIL. **(A)** Viability of MBr-FmC cells in the presence of conditioned medium collected from NSC or NSC-S-TRAIL cells. **(B)** Top:

Representative bioluminescent images of MBr-FmC tumor growth in the presence of NSC-GFP or NSC-S-TRAIL taken on days 0, 2, 4, 6 and 32 after intracranial implantation. Bottom: Plot showing the Fluc activity of MBr-FmC tumors admixed with NSC-GFP or NSC-S-TRAIL at the time of implantation.

Figure 5. (A) Representative phase and fluorescent images of NSC-TR-TK-GFI in the presence or absence of 10 mg/ml GCV. Plot showing the Fluc activity of transduced cells in vitro. (B) Viability of MBr-FmC cells co-cultured with modified NSC at 1:1 ratio as measured by Fluc activity in vitro. The effects of NSC engineered with TK or TK-TR are shown. (C) Upper, outline of the experiment. Representative fluorescent images of metastatic MBr-RmC tumors in the mouse brain with or without NSC-TR-TK-GFI administration to show post-tumor treatment (scale bar = 100  $\mu$ m).
